# Supplementary material for: A hydrophobic gate in the inner pore helix is the major determinant of inactivation in mechanosensitive Piezo channels
Source: eLife journal article supplement (doi:10.7554/elife.44003), 2019-01-10
Supplement: supp [file elife-44003-supp-v1.zip]

Archive with 10 entries (10 files):
- elife_poa_e44003_Figure_3_source_data_1.xlsx
- elife_poa_e44003_Figure_4_source_data_1.xlsx
- elife_poa_e44003_Figure_1_source_data_1.xlsx
- elife_poa_e44003_Transparent_Reporting_File.pdf
- elife_poa_e44003_Figure_2_figure_supplement_1.jpg
- elife_poa_e44003_Figure_2_source_data_1.xlsx
- elife_poa_e44003_Figure_1_figure_supplement_1_source_data_1.xlsx
- elife_poa_e44003_Figure_1_figure_supplement_1.jpg
- elife_poa_e44003_Figure_2_figure_supplement_1_source_data_1.xlsx
- elife_poa_e44003_Figure_5_source_data_1.xlsx
