# Supplementary material for: A hydrophobic gate in the inner pore helix is the major determinant of inactivation in mechanosensitive Piezo channels
Source: eLife journal article supplement (doi:10.7554/elife.44003), 2019-01-10
Supplement: supp [file elife-44003-supp-v1.zip › elife_poa_e44003_Figure_1_figure_supplement_1_source_data_1.xlsx]

## Sheet: Sheet1
			L2475S/V2476S	L2475S/V2476S-P2536G/E2537G
		Iremaining/Ipost	0.650281	0.007743
			0.745137	0.059398
			0.803398	0.154596
			0.693182	0.144578
			0.687407	0.089441
			0.746325	0.011747
			0.798561	0.102549
