# Supplementary material for: A hydrophobic gate in the inner pore helix is the major determinant of inactivation in mechanosensitive Piezo channels
Source: eLife journal article supplement (doi:10.7554/elife.44003), 2019-01-10
Supplement: supp [file elife-44003-supp-v1.zip › elife_poa_e44003_Figure_1_source_data_1.xlsx]

## Sheet: Sheet1
Figure 1 panel D													Figure 1 panel F
	QQ	NN	SS	TT	GG	AA	VV	LL	II	MF (WT)	WW			Piezo1 WT	P2536G/E2537G
													τinac (ms)	12.609	15.2168
τinac (ms)	28.2919	26.5077	17.1147	38.2192	32.9171	27.9592	22.5851	31.571	26.305	14.439	21.1508			12.6037	18.2378
	29.0738	24.4688	16.1328	30.0695	27.4177	32.0269	25.1174	30.2012	30.5289	11.0381	25.6067			10.8505	18.5117
	33.0301	24.918	14.0298	26.1506	28.2421	26.4712	20.2818	28.5031	30.0297	12.5039	12.8806			13.0227	20.8425
	29.6491	28.4265	12.6494	29.897	21.2041	24.8357	21.1324	23.4238	27.1829	9.89643	18.4867			10.3144	18.8915
	28.1379	28.4272	9.86219	38.6798	30.125	28.5459	15.7428	28.731	36.1103	11.7287	17.1796			11.0885	18.5159
	30.3248	33.7522	10.2446	34.0068	25.4373	25.6883	21.0377	24.374	22.6552	13.6137	20.9977			15.2939	19.8675
	31.8542	25.276	13.5475	26.1482	31.8542	30.1232	18.7931	27.8663	27.9748	10.2365	19.6325			13.0836	12.5901
		24.6673			29.7397									9.45023	16.0664
		21.7401													17.4154
Figure 1 panel G
	Indentation (μm)	Piezo1 WT (n=9)
Ipeak (nA)	1	-0.04122	-0.04227	0.040123	-0.04537	-0.0359	0.059825	0.03276	-0.03761	0.039447
	2	-0.03903	-0.04228	-0.0392	0.044687	-0.03944	0.043403	-0.04046	-0.03848	-0.0376
	3	0.03998	-0.03991	0.041541	-0.04317	-0.04177	0.042991	0.035464	-0.03644	0.03544
	4	-0.03643	0.037335	-0.04019	-0.05388	-0.04223	-0.08551	-0.04067	-0.03731	-0.03643
	5	-0.04095	-0.03836	-0.16161	-0.04843	-0.06968	-0.60015	-0.0448	-0.03835	-0.04546
	6	-0.03879	-0.07902	-0.60512	-0.07553	-0.30084	-1.90989	-0.04234	-0.03762	-0.05997
	7	-0.0402	-0.25686	-1.56647	-0.47548	-0.40372	-5.72354	-0.06494	-0.07992	-0.1045
	8	-0.03931	-0.35754	-2.60123	-1.3207	-0.91684	-8.76964	-0.22403	-0.46946	-0.18168
	9	-0.04824	-0.80335	-5.13778	-2.51528	-0.87456	-12.3939	-0.82527	-2.26634	-0.39345
	10	-0.17694	-1.59756	-7.56043	-5.33425	-2.50797	-14.485	-1.4511	-5.48986	-1.57372
	11	-0.44734	-3.1644	-9.06153	-9.8356	-6.07946	-15.5574	-4.04432	-10.7361	-2.42054
		P2536G/E2537G (n=10)
Ipeak (nA)	1	0.044955	0.044351	-0.07789	-0.04	0.064842	-0.06485	-0.05098	-0.04427	0.034218	-0.04617
	2	-0.04206	-0.0489	0.064031	0.048708	0.054409	-0.05023	0.047069	0.046065	0.038568	-0.04388
	3	-0.0398	-0.04023	0.077959	-0.04906	0.038345	-0.0746	-0.04847	0.039143	-0.05555	-0.04298
	4	-0.05055	0.041011	-0.09559	0.050715	-0.04581	-0.06417	0.053659	-0.03616	0.041637	-0.04595
	5	-0.0424	0.040984	-0.10089	0.048538	-0.06326	0.061648	0.060296	0.037888	0.054817	-0.04063
	6	-0.0436	0.045679	-0.09964	-0.04937	-0.06185	-0.06462	-0.0844	-0.03839	0.056943	-0.04285
	7	0.04381	-0.03892	-0.09743	-0.05545	-0.07264	-0.08055	-0.46149	-0.03715	0.059337	-0.04095
	8	0.04334	0.044167	0.101466	-0.05262	-0.04294	-0.09714	-0.68419	0.031173	-0.08342	-0.09087
	9	0.049605	0.042518	-0.10787	-0.05094	-0.05977	-0.07982	-1.00413	-0.03379	-0.40023	-0.22151
	10	0.047867	0.039157	-0.22367	-0.06731	0.04875	0.08633	-1.53867	-0.22521	-0.63031	-0.42275
	11	-0.08625	0.041253	-0.35539	-0.51315	0.039212	0.082225	-2.85483	-1.36549	-1.94941	-0.91227
