# Supplementary material for: A hydrophobic gate in the inner pore helix is the major determinant of inactivation in mechanosensitive Piezo channels
Source: eLife journal article supplement (doi:10.7554/elife.44003), 2019-01-10
Supplement: supp [file elife-44003-supp-v1.zip › elife_poa_e44003_Figure_2_figure_supplement_1_source_data_1.xlsx]

## Sheet: Sheet1
		GFP	WT	L2475S	V2476S	L2475S/V2476S				GFP	WT	L2475S	V2476S	L2475S/V2476S
	Current at -100 mV (pA/pF)	0.043	0.29	0.024	0.232	0.33			Current at +100 mV (pA/pF)	0.376667	0.285	0.503333	0.88	0.991667
		0.201	0.189	0.232	0.183	0.208				0.58	0.61	1.09333	0.905	0.59
		0.197	0.098	0.11	0.049	0.104				0.899167	0.726667	0.416667	0.57	0.488333
		0.061	0.134	0.128	0.11	0.195				0.396667	0.6	0.335833	0.360833	0.473333
		0.22	0.14	0.238	0.146	0.043				0.644167	0.87	0.285	1.0475	1.16
		0.098	0.085	0.214	0.159	0.11				1.0225	0.4475	0.885	0.508333	0.671667
			0.122	0.061	0.214	0.159					0.6775	0.508333	0.524167	0.575
				0.214		0.104						0.854167		0.585
						0.055								0.660833
