# Supplementary material for: A hydrophobic gate in the inner pore helix is the major determinant of inactivation in mechanosensitive Piezo channels
Source: eLife journal article supplement (doi:10.7554/elife.44003), 2019-01-10
Supplement: supp [file elife-44003-supp-v1.zip › elife_poa_e44003_Figure_2_source_data_1.xlsx]

## Sheet: Sheet1
Figure 2 panel B											Figure 2 panel E						Figure 2 panel D						Figure 2 panel G
	WT	L2469S	I2473S	V2474S	L2475S	V2476S	V2477S	F2480S	L2475S/V2476S			WT	L2475S	V2476S	L2475S/ V2476S			WT	L2475S	V2476S	L2475S/ V2476S			WT	L2475S	V2476S	L2475S/ V2476S
τinact (ms)	6.31816	3.11874	2.54714	2.33605	69.6963	69.1094	2.03421	12.852	109.7		Rise time (10%-90%, ms)	2.47628	2.17062	2.67925	3.39		Threshold (μm)	5	7	5	3		Erev (mV)	5.3	7.1	8.9	5.9
	11.5319	1.95078	2.68938	2.56856	43.4498	36.9615	2.61437	12.011	113.182			2.67055	3.02105	2.26396	1.9948			5	5	4	8			9.2	11.2	8.2	9.3
	8.92856	2.2348	1.81819	2.74092	79.0356	49.4602	2.12937	12.8025	94.0021			2.46148	2.17568	2.86947	1.88981			4	7	5	6			9.5	8.9	13.3	9.7
	7.19255	2.471	1.6285	4.08161	54.8503	46.7289	2.53239	14.5409	123.661			2.34138	2.13833	2.32412	2.30327			7	7	7	6			6.1	6.8	7.7	5.5
	7.06323	2.26871	1.46149	2.24117	57.051	44.6652	2.08713	13.4524	107.672			2.29668	2.53215	2.40319	2.65967			6	4	5	5			8.8	7.8	7.8	8.7
	7.60244	2.70175	1.5	3.89741	76.2763	46.4385	2.91478	12.2764	89.2119			2.1092	2.41363	2.08993	2.10001			7	8	6	6			5.6	8.1	5.3	7.8
	8.12278	1.7494	1.69333	3.95663	62.5516	38.9056	1.95778	15.2797	99.514			2.02795	1.98787	3.2285	2.67248			7	6	8	4			4.8	9.2	7.8	7.9
	8.73154	3.17729	2.25115	2.74765	54.2295	40.7822	3.08158	17.3462	122.693			1.98431	2.18311	2.20214	2.07698			4	5	8	3			4.9	6.2	6.9	10.8
	10.3636	3.44579	1.77937	3.32895	56.7352	44.4539	2.17105		93.4923			2.22219	2.13529	2.98009	1.95865			6	6	6	7			4.9	7.6	6.5	11.6
	7.84	2.80211	1.55579	2.95579	65.4621	51.7871	2.77263		87.8998			2.56437	2.86303	2.15664	3.72328			6	6	6	5					4.9	5.2
	9.58177	1.69158	2.27632		50.686	62.841	2.80211		133.856			2.85186	2.38552	2.83238	3.0707			9	4	7	5
	12.0285	2.21842	2.82368		64.4129	48.0353	2.00842		119.848			2.21349	2.24501	3.00037				6	6	6	4
	13.6635				64.1629	34.1562			92.7146			2.86752	3.04153					6	6	7	4
	13.1197				61.1943	38.5258			98.3019									5	7	4	8
	11.7911				69.1152	47.1292			91.1575									6	8	4	4
	9.50694				64.7427	44.4256			97.3028									8	7	5	9
	7.82107				65.3285	45.4784			85.5164									8	5	5	7
	6.74494				67.2694	50.6371			103.378									8	6	6	5
						45.7348			107.04									6	3		6
						42.256			94.2502									7	4		5
						56.3795			104.836									6	7		6
						43.9947												6			7
																		6			5
																		8			5
																		7			7
			Figure 2 panel C
				Indentation	Piezo1 WT (n = 21)																						L2475S (n = 16)																	V2476S (n =12)
			Ipeak (nA)	1	0.062023	0.056364	-0.04225	-0.03538	-0.03784	-0.04608	0.039326	0.032431	0.044715	0.047608	-0.05935	0.038424	0.038893	-0.04575	-0.04218	-0.04297	-0.0364	0.031992	0.044276	-0.06026	0.045494		-0.05323	0.051044	0.049642	0.037535	0.03928	0.045873	0.033804	-0.04627	-0.03496	0.048014	-0.03289	0.048894	0.042138	-0.04982	-0.03178	-0.04039		0.041232	-0.03701	0.040198	0.035196	-0.03217	-0.04838
				2	0.057214	-0.05879	-0.04316	-0.04106	-0.04103	-0.04103	0.035557	-0.03765	0.046353	0.033804	-0.07591	-0.04026	-0.03665	-0.04022	-0.04607	-0.03812	0.038997	0.037026	-0.03902	0.035959	-0.04508		-0.04111	-0.05098	0.059299	0.035295	-0.03877	-0.04315	-0.03975	0.038336	-0.04007	-0.0419	-0.03045	-0.05071	-0.04349	-0.04399	-0.03292	0.043438		0.042237	-0.03591	0.038841	0.041429	-0.03345	-0.04652
				3	-0.06077	0.062716	0.049632	-0.04528	0.039747	-0.04697	-0.0362	-0.03826	-0.04459	-0.03397	-0.12166	0.040208	0.036269	0.049744	-0.05016	-0.04092	-0.03596	-0.0361	-0.04087	0.041925	0.040758		0.045214	0.044403	-0.05002	-0.03853	-0.04524	-0.07547	0.035951	-0.04469	0.036341	-0.03846	-0.03297	0.050833	-0.05289	0.044625	-0.02915	-0.04822		-0.03902	-0.03897	0.042235	-0.04094	-0.03316	0.047724
				4	-0.05951	-0.05391	-0.08259	0.040635	0.04901	-0.03746	-0.03183	-0.10301	0.04563	0.031019	0.150738	-0.03991	-0.03538	0.036229	-0.04905	-0.03692	0.03898	-0.04386	-0.04105	0.035876	0.048546		-0.04809	-0.04956	-0.04823	0.036943	-0.09633	0.041099	-0.05439	-0.0389	-0.03825	-0.03922	-0.03763	0.053218	-0.05115	0.049805	-0.03917	0.044772		-0.04867	-0.03912	-0.03959	-0.04588	-0.03853	0.044421
				5	-0.24681	-0.19618	-0.22921	0.040769	0.038681	-0.04055	-0.03431	-0.52466	-0.04289	0.032129	0.148456	-0.05155	-0.0455	0.03673	-0.04826	0.046359	-0.04512	-0.04594	-0.04112	-0.03765	-0.03999		-0.05736	-0.43896	-0.04773	-0.0367	-0.40827	-0.05542	-0.12524	-0.07302	-0.05415	-0.0437	-0.03923	-0.05148	-0.04686	0.047237	-0.0358	0.049546		-0.1281	-0.07659	0.038382	-0.17337	-0.08908	0.046312
				6	-0.85346	-0.96277	-0.68635	-0.05212	-0.05279	-0.03955	0.033645	-1.77859	-0.09805	-0.07326	0.10038	-0.09589	-0.17074	0.040197	-0.04979	0.042788	-0.14074	-0.15317	-0.09653	0.043436	-0.04943		0.04348	-2.39709	-0.05377	-0.04848	-2.00865	-0.06155	-1.0468	-0.31117	-0.11689	-0.21533	-0.13377	-0.05506	0.045882	-0.05117	-0.33479	-0.05831		-0.57949	-0.30346	-0.04607	-1.68306	-0.78346	0.047371
				7	-2.32248	-2.29118	-2.43851	-0.25051	-0.3714	-0.0817	-0.08497	-5.72608	-0.17493	-0.19602	0.273455	-0.2365	-1.27002	-0.03906	-0.08527	-0.05018	-0.94714	-0.49488	-0.27071	-0.05809	-0.04388		-0.11054	-2.89948	-0.08222	-0.19012	-3.14313	-0.10369	-2.38466	-1.25551	-0.59369	-0.48129	-0.89037	-0.23826	-0.04859	-0.09139	-0.37656	-0.15651		-3.37674	-0.81047	-0.23421	-5.00568	-3.02839	-0.05209
				8	-6.20359	-4.83503	-6.81476	-0.70873	-0.93324	-0.2378	-0.25542	-11.9176	-0.47696	-0.78039	0.272279	-0.36562	-3.30994	-0.1288	-0.63317	-0.20554	-2.45416	-1.96873	-0.83683	-0.13365	-0.12243		-1.3702	-4.34771	-0.38138	-0.50837	-4.25823	-0.41796	-1.68302	-2.302	-1.2428	-0.35849	-1.79171	-0.64757	-0.38055	-0.53066	-1.06622	-1.42707		-8.38523	-2.78772	-0.76733	-8.89078	-4.6843	-0.20441
				9	-12.3392	-11.3821	-11.9669	-1.73695	-2.51427	-2.01729	-0.85953	-4.5035	-1.07617	-0.81067	-2.35757	-1.24415	-5.68702	-0.58175	-3.24911	-1.02693	-4.18436	-4.42543	-1.68007	-0.34198	-0.82661		-2.51836	-4.66949	-1.10638	-1.39104	-13.5073	-3.38644	-2.10923	-2.69439	-2.02507	-1.59335	-3.91011	-1.37924	-1.07508	-0.93665	-3.12154	-3.52133		-9.53895	-5.53918	-3.2921	-15.3559	-5.32135	-0.65908
				10	-16.7655	-18.1419	-12.9439	-3.74048	-6.31473	-6.48521	-1.8418	-16.5154	-4.68401	-4.81167	-5.53711	-4.1219	-5.50512	-1.61598	-7.95766	-2.78256	-5.08479	-11.2671	-1.88126	-0.82692	-3.28589		-4.34331	-5.63004	-2.85212	-3.38388	-2.96532	-6.84037	-11.0512	-5.47001	-7.33794	-2.18966	-5.35525	-2.72334	-1.79989	-1.74375	-6.01221	-6.86522		-10.643	-7.30059	-4.72582	-18.2042	-8.52318	-1.29153
[truncated: 16 more columns]
