# Supplementary material for: A hydrophobic gate in the inner pore helix is the major determinant of inactivation in mechanosensitive Piezo channels
Source: eLife journal article supplement (doi:10.7554/elife.44003), 2019-01-10
Supplement: supp [file elife-44003-supp-v1.zip › elife_poa_e44003_Figure_3_source_data_1.xlsx]

## Sheet: Sheet1
	Figure 3 panel A												Figure 3 panel B
		mutations at L2475												Mutations at V2476
		Q	N	S	T	G	A	V	L (WT)	I	F			Q	N	S	T	G	A	V (WT)	L	I	F
	τinact (ms)	116.437	95.1936	69.6963	29.8863	47.2227	21.4715	4.20247	13.1426	2.8509	9.70425		τinact (ms	87.1271	90.2311	69.1094	32.8384	24.0779	41.1803	11.879	3.22815	2.39094	2.56654
		139.724	117.195	43.4498	29.6432	35.2439	17.8239	2.32121	11.8487	2.78118	11.4281			77.1869	75.3453	36.9615	19.3134	26.3475	48.4	11.6898	2.64032	2.57912	3.4884
		109.632	125.351	79.0356	26.8197	44.0698	28.522	3.59592	9.00364	3.64055	9.51869			102.42	68.7974	49.4602	29.3799	33.7028	33.388	9.42875	2.4053	2.53582	2.67385
		126.137	89.075	54.8503	19.4212	39.0187	19.4297	2.09978	8.75895	2.7067	9.18001			84.2369	64.8952	46.7289	30.4767	25.1031	50.073	8.53478	2.7986	1.97205	2.17307
		120.753	128.131	57.051	19.2126	42.9137	25.4478	2.30553	11.5648	2.80682	12.0323			82.0031	91.7596	44.6652	25.3224	21.6346	47.5442	10.1442	2.10865	1.70013	2.86547
		139.834	115.781	76.2763	21.9729	33.0878	19.3299	3.45622	10.8579	2.00132	11.475			97.5066	69.5222	46.4385	27.5688	29.7942	39.4888	10.4579	2.53923	1.84957	2.32124
		118.841	136.224	62.5516	32.0671	42.5993	22.8553	3.01235	10.2455	2.82456	9.5264			79.5235	73.5502	38.9056	31.2455	38.5819	35.593		2.74252	2.21444	2.45256
			110.493	54.2295	27.9749	36.6456		2.22649			10.1938			81.2179	99.5316	40.7822		39.0084
			97.2485	56.7352		37.7065		2.26018			8.15074				85.8957	44.4539
				65.4621		43.2214										51.7871
				50.686												62.841
				64.4129												48.0353
				64.1629												34.1562
				61.1943												38.5258
				69.1152												47.1292
				64.7427												44.4256
				65.3285												45.4784
				67.2694												50.6371
																45.7348
																42.256
																56.3795
																43.9947
