# Supplementary material for: A hydrophobic gate in the inner pore helix is the major determinant of inactivation in mechanosensitive Piezo channels
Source: eLife journal article supplement (doi:10.7554/elife.44003), 2019-01-10
Supplement: supp [file elife-44003-supp-v1.zip › elife_poa_e44003_Figure_4_source_data_1.xlsx]

## Sheet: Sheet1
Figure 4 panel B
	time	Piezo1 WT (n = 8)									MF/QQ (n = 8)									LV/QQ (n = 15)														LV/QQ-MF/QQ (n = 10)												V2476Q (n = 8)
Normalized Iremaining/Ipeak	0	1	1	1	1	1	1	1	1		1	1	1	1	1	1	1	1		1	1	1	1	1	1	1	1	1	1	1	1	1		1	1	1	1	1	1	1	1	1	1	1		1	1	1	1
	50	0.053981	0.052607	0.026304	0.027986	0.027321	0.04943	0.01991	0.027126		0.230044	0.268592	0.330341	0.315309	0.250288	0.296761	0.244213	0.186318		0.754732	0.711321	0.818727	0.790689	0.77911	0.851064	0.842958	0.691318	0.67156	0.716681	0.759184	0.791479	0.693707		0.986794	0.966579	0.943953	0.858131	0.976099	0.950727	1.04112	0.952632	0.867647	0.928447	0.974715		0.628074	0.683392	0.623307	0.651538
	100	0.015495	0.006066	0.006954	0.004182	0.005456	0.008365	0.007707	0.006883		0.050283	0.040433	0.077199	0.064728	0.065513	0.056884	0.064043	0.028485		0.604511	0.598113	0.710684	0.662755	0.648973	0.782506	0.760892	0.575563	0.546789	0.572816	0.612245	0.689724	0.529947		0.953045	0.950748	0.890855	0.892734	0.948375	0.899031	1.07383	0.826316	0.817647	0.896161	0.9323		0.403549	0.483963	0.425031	0.492308
	200	0.005998	0.001137	0.001814	0.008605	0.004479	0.007909	0.002762	0.004453		0.010371	0.002671	0.013106	0.005287	0.019839	0.009545	0.015818	0.006304		0.451873	0.492453	0.627851	0.573429	0.558219	0.676123	0.75076	0.530547	0.438532	0.500441	0.467347	0.605013	0.423048		0.995598	0.884785	0.876106	0.875433	0.910134	0.869144	1.09439	0.865789	0.814706	0.827225	0.89478		0.209592	0.326135	0.25508	0.323846
	300	0.009447	0.005213	0.004611	0.005147	0.006922	0.003802	0.003918	0.007287		0.008799	0.003538	0.009874	0.004166	0.014994	0.004146	0.008873	0.004436		0.396295	0.424528	0.530612	0.523467	0.506849	0.658392	0.736575	0.430868	0.420183	0.479259	0.381633	0.557895	0.38135		1.02054	0.901495	0.849558	0.806228	0.879541	0.839257	1.12804	0.834211	0.811765	0.813264	0.850734		0.124736	0.24611	0.19335	0.244615
[truncated: 11 more columns]
