# Supplementary material for: A hydrophobic gate in the inner pore helix is the major determinant of inactivation in mechanosensitive Piezo channels
Source: eLife journal article supplement (doi:10.7554/elife.44003), 2019-01-10
Supplement: supp [file elife-44003-supp-v1.zip › elife_poa_e44003_Figure_5_source_data_1.xlsx]

## Sheet: Sheet1
	Figure 5 panel C						Figure 5 panel E					Figure 5 panel F					Figure 5 panel I
		WT	L2750S	V2751S	MF/QQ			WT	L2750S	V2751S			WT	L2750S	V2751S			WT	L2750S	V2751S
	τinact (ms)	3.12765	13.5363	6.87921	2.88565		Threshold (μm)	5	4	4		Rise time (10%-90%, ms)	2.0927	2.54739	2.50844		Erev (mV)	6.5	6.9	6.25
		2.37307	7.78585	31.5621	2.51264			6	6	4			3.11691	2.95832	3.06488			5.2	6	5.4
		1.69873	5.32937	7.45288	2.41642			5	6	5			2.54366	2.43322	1.7102			6	5.5	5.9
		2.65122	9.11103	6.27594	3.00425			6	3	5			2.36466	3.25577	1.99823			5.65	6.4	4.65
		2.45583	8.53057	9.80776	2.1574			5	5	6			1.69669	2.53408	1.57363			4.63	6.1	4.33
		2.11777	12.1481	8.66501	2.42793			4	4	4			2.32749	2.54573	2.09437			5.52	6.03	5.7
		2.08179	8.75738	24.1374	3.5775			4	5	7			2.2017	3.31055	2.34054			6.4	7	6.6
		2.53838	5.61262	11.1584	3.0575			5	5	5			2.24225	2.19064	2.34161			7.4	6.3	6.35
		2.20655	7.24605	25.0951	2.23512			7	5	5			2.39663	2.33792	2.46215					7.12
		2.78916	5.52611	16.57				6	7	5			2.33718	2.18322	2.58591
		2.32096	7.99951	11.221				5	7	6			2.13671	2.36095	1.5037
		2.6633	9.5448	6.91691				6	4	4			1.96507	2.12801	2.65782
		2.5562	6.83627	17.2078				5	5	5			2.29786	2.33601	2.54235
		2.854	7.66947	10.6013				5	6	3			1.9719	2.63998
		2.3105	7.23194	16.7956					6				2.33717	2.01679
		2.7742	9.98458	12.7254					5
		3.2293	7.54279	7.25427					5
		2.5552	5.78527	9.30352					7
			12.5414	8.54815
			10.6897	20.2813
			5.45445	24.5115
				12.2849
				13.8242
				21.0792
Figure 5 panel D
	Indentation (μm)	Piezo2 WT (n = 15)																L2750S (n = 16)																	V2751S (n = 11)
Ipeak (nA)	1	-0.03917	0.034064	-0.03585	-0.04234	0.04066	-0.04049	0.038191	-0.03163	0.050418	0.044485	0.035676	-0.04227	0.035136	-0.03771	0.039805		-0.04422	0.044943	0.038041	-0.03824	0.040741	0.030463	-0.03756	-0.03393	-0.03238	-0.03975	-0.03644	-0.03124	0.036199	0.041322	-0.08077	-0.03608		-0.03669	-0.04025	-0.03463	-0.03269	-0.04429	-0.033	-0.03531	-0.03997	0.033666	0.042629	-0.03494
	2	0.037633	-0.04054	-0.03721	-0.04567	0.036926	0.033738	0.039958	0.034925	-0.04387	0.047297	0.033713	-0.04095	0.037636	-0.0456	-0.04535		-0.04211	-0.05022	-0.03729	0.035581	-0.05297	0.028489	-0.03432	-0.03506	-0.03612	-0.04999	0.044749	-0.03543	-0.03939	-0.03834	-0.07737	-0.03889		-0.04225	-0.05775	0.031871	-0.03761	-0.0398	-0.03726	0.03941	0.034057	0.035103	0.037484	-0.03288
	3	-0.03862	-0.03277	-0.04101	0.053196	0.036617	-0.0398	0.039526	0.032928	-0.04009	-0.04108	0.037004	0.043665	0.033207	0.049673	0.055865		-0.04396	-0.04195	0.039442	-0.03663	-0.05229	0.030869	-0.04144	-0.03568	-0.03963	-0.04551	0.038924	-0.09622	-0.04108	-0.04224	0.094681	-0.03609		-0.0434	-0.04045	-0.03483	-0.0392	0.041654	-0.03615	0.034304	-0.04368	-0.05537	-0.0367	-0.1247
	4	0.040585	-0.03644	-0.04785	-0.04899	0.037737	-0.11554	-0.07375	-0.04105	-0.04461	-0.0417	-0.03107	-0.05402	-0.03875	-0.04057	-0.04196		-0.03985	0.0477	-0.06165	-0.11413	-0.04056	-0.0677	-0.04516	0.037634	-0.18163	0.04118	0.046026	-0.20282	-0.04563	-0.06521	0.087487	-0.03672		-0.09561	-0.06141	0.036321	-0.19873	-0.04335	-0.03726	-0.04722	-0.07489	-0.10794	-0.04898	-0.62047
	5	-0.13096	0.034311	-0.14257	-0.06311	-0.07192	-0.65006	-0.37561	-0.09919	-0.04766	-0.05468	-0.03673	-0.12574	0.02979	-0.04146	-0.04971		-0.04726	-0.0489	-0.16157	-0.26036	-0.10797	-0.15458	-0.11924	-0.03821	-0.5297	-0.12303	-0.07046	-0.40177	-0.05417	-0.18359	-0.21124	0.04013		-0.31449	-0.10987	-0.07376	-0.68171	-0.10621	-0.13434	-0.11747	-0.24756	-0.36594	-0.11261	-1.09193
	6	-0.50632	-0.05645	-0.33923	-0.12918	-0.19888	-1.97441	-1.48598	-0.38536	-0.04327	-0.13682	-0.08742	-0.54593	0.036547	0.042805	0.04427		-0.09165	-0.07887	-0.46938	-0.50456	-0.3367	-0.26255	-0.28374	-0.04412	-1.54387	-0.4037	-0.25711	-0.48818	-0.12226	-0.70151	-0.53802	-0.05979		-0.598	-0.20786	-0.293	-1.41973	-0.45966	-0.4304	-0.38794	-0.51245	-0.8445	-0.3264	-1.29229
	7	-1.9772	-0.11504	-0.76876	-0.23666	-0.57057	-4.43919	-3.75803	-0.97469	-0.08724	-0.32327	-0.10633	-1.82444	-0.06397	-0.04892	-0.0531		-0.20197	-0.15175	-0.99048	-0.72257	-0.9266	-0.51497	-0.62074	-0.1097	-3.88653	-1.01243	-0.75776	-0.82484	-0.33593	-2.10583	-1.19186	-0.1571		-1.11549	-0.45149	-1.21584	-2.21672	-1.70738	-0.82688	-0.55597	-0.73611	-1.37706	-0.61233	-1.39939
	8	-4.05057	-0.23139	-1.13512	-0.35188	-1.20961	-6.22968	-6.27574	-2.26798	-0.22149	-0.637	-0.18705	-4.2543	-0.18277	-0.23794	-0.12066		-0.47249	-0.24057	-1.31206	-1.02867	-2.05675	-0.97717	-1.11274	-0.29443	-6.08236	-2.51263	-1.72546	-1.50531	-0.81033	-3.91959	-2.1386	-0.3089		-1.64998	-0.67169	-2.27041	-2.97653	-3.306	-1.31085	-0.63955	-1.04523	-2.09382	-0.89517	-1.51002
	9	-4.46848	-0.48377	-1.56837	-0.71335	-2.13163	-7.99392	-8.50603	-4.21765	-0.4746	-1.12084	-0.60576	-7.15503	-0.29854	-0.66435	-0.46191		-1.057	-0.36452	-1.58294	-1.39484	-3.85218	-1.80237	-1.55544	-0.79822	-7.58694	-4.77203	-2.80128	-2.60019	-1.49104	-4.95336	-2.80317	-0.61554		-1.96825	-1.20038	-2.90574	-3.18868	-4.95195	-2.2177	-0.95469	-1.12284	-2.39618	-1.18689	-1.72319
	10	-4.85218	-1.10615	-2.01222	-1.21352	-3.62566	-8.6565	-9.2131	-6.25594	-0.83136	-2.03444	-1.49635	-9.52365	-0.79686	-1.45654	-1.03762		-1.57544	-0.76426	-1.90116	-1.82907	-4.40356	-2.02846	-2.44736	-1.47498	-8.75547	-7.26703	-4.06364	-3.18844	-2.28672	-6.56349	-3.90627	-1.31423		-2.21586	-1.97665	-3.37248	-3.96456	-5.53296	-3.14539	-1.35623	-1.06466	-2.75645	-2.44698	-3.25425
Figure 5 panel H
	Vm (mV)	Piezo2 WT (n = 8)									L2750S (n = 8)									V2751S (n = 9)
Ipeak (nA)	-100	-5.15679	-2.21089	-10.6047	-2.63615	-1.09152	-2.04347	-2.67646	-1.58694		-2.49281	-4.21436	-6.42714	-1.96502	-1.95063	-2.16358	-0.81613	-3.7059		-6.59084	-6.30291	-1.95862	-2.49922	-2.95445	-0.64742	-1.74287	-1.4759	-0.72154
	-80	-4.13106	-1.23968	-8.07945	-1.5086	-0.57121	-1.66701	-1.94057	-1.18293		-2.37581	-3.42549	-4.977	-1.5434	-1.49634	-1.0339	-0.70618	-2.93022		-3.94165	-4.4147	-1.43587	-1.62898	-2.29016	-0.49376	-1.46809	-1.20602	-0.53889
	-60	-2.97521	-1.02018	-6.30584	-1.26379	-0.50229	-1.00365	-1.4876	-0.58052		-1.88588	-3.03942	-3.50497	-1.0382	-1.2047	-0.24165	-0.52602	-2.4512		-3.35557	-2.05827	-0.82782	-0.45204	-1.38344	-0.39757	-1.11566	-0.88688	-0.46039
	-40	-1.01306	-0.53498	-5.1273	-0.87421	-0.41114	-0.62727	-0.89063	-0.60159		-1.29259	-2.258	-2.28468	-0.68358	-0.72861	-0.17634	-0.37917	-1.65915		-2.41287	-0.76246	-0.56782	-0.79934	-0.69837	-0.29731	-0.8055	-0.61119	-0.3353
	-20	-0.72441	-0.40298	-3.00323	-0.593	-0.26007	-0.43345	-0.56668	-0.33322		-0.7333	-1.4763	-1.50606	-0.39049	-0.42498	-0.16476	-0.2395	-0.98202		-0.66229	-0.53741	-0.31594	-0.56782	-0.25731	-0.20726	-0.46319	-0.3441	-0.21568
	0	-0.18697	-0.095	-0.68382	-0.1323	-0.06809	-0.0874	-0.13267	-0.05501		-0.1109	-0.45252	-0.23977	-0.12481	-0.12203	-0.07494	-0.08026	-0.34916		-0.13691	-0.13053	-0.09203	-0.11376	-0.07254	-0.08113	-0.15477	-0.11187	-0.07961
	20	0.264282	0.207549	1.54344	0.284526	0.114816	0.157675	0.212188	0.249246		0.165526	0.680407	0.401145	0.203181	0.218424	0.143042	0.109124	0.593239		0.238309	0.133737	0.251544	0.193523	0.182388	0.119865	0.231192	0.159139	0.126469
	40	0.849514	0.583248	4.29106	0.851774	0.338137	0.397929	0.54533	0.639233		0.360722	1.82899	0.897993	0.516317	0.60255	0.456043	0.249344	1.27523		0.555081	0.781082	0.680254	0.30304	0.551785	0.276332	0.564296	0.369518	0.288675
	60	1.35556	1.00688	6.83336	1.25577	0.463652	0.851705	0.882674	1.20229		0.558709	3.57192	1.6546	0.827418	1.05749	0.907278	0.387257	2.24571		1.1703	2.19439	1.17673	1.05838	1.36268	0.690532	0.917177	0.589858	0.476688
	80	2.08896	1.3932	9.73223	1.98784	0.790767	1.34276	1.48259	2.29205		0.83681	5.35653	2.59792	1.08682	2.25171	1.24794	0.619629	3.5544		2.21926	4.2767	2.15133	1.616	2.38515	0.823558	1.37869	0.857765	0.739671
	100	4.19115	2.0794	10.1844	2.65262	1.02505	1.85117	2.29235	3.72454		1.16009	6.94377	3.4256	1.61577	4.34298	2.45481	0.891787	5.61046		4.21977	6.19538	3.02767	4.02424	3.17224	1.12116	1.74	1.1196	1.11552
Figure 5 panel J
	Vm (mV)	Piezo2 WT (n = 8)									L2750S (n = 8)									V2751S (n = 9)
τinac (ms)	-100	3.76652	2.17308	2.76357	1.98401	2.05531	2.07223	2.3673	2.19237		2.1557	12.3411	11.9107	9.70178	12.1562	6.35022	3.09841	3.02406		12.6632	13.2105	5.82035	8.53295	12.2792	6.6266	12.4735	17.2129	16.0071
	-80	2.92663	2.19754	2.74916	2.12393	2.40382	2.37377	2.5286	1.81135		2.18658	13.5548	12.9177	11.9551	12.5493	6.80504	3.50952	4.0924		16.3855	13.7992	6.74122	8.05855	15.3808	8.90318	10.9801	16.2252	15.9867
	-60	2.86248	2.58136	3.51087	2.49915	2.4762	2.45886	2.91247	2.12452		2.97125	16.5458	15.0508	14.3594	12.7594	7.36731	4.42117	3.9608		17.6546	15.066	8.95484	7.86133	15.4585	11.0307	13.3444	17.5121	15.4241
	-40	2.55064	3.06034	4.217	2.62654	2.88137	2.90576	3.22707	2.38655		3.56795	17.9651	17.6131	17.8905	13.042	7.09558	5.26417	4.56297		18.2068	15.3111	11.5807	8.54566	16.1746	11.2085	15.7423	17.8833	19.3721
	-20	3.24977	3.59586	5.59786	3.38463	3.18591	3.44528	3.55177	3.27427		4.60877	21.1119	20.1967	20.3494	12.8671	9.93623	5.69283	6.30555		40.9988	15.8615	12.9836	10.3205	14.0364	12.6544	15.9072	15.366	23.1462
	0	4.01309	3.88259	6.7778	3.79807	3.78645	3.77512	4.5711	4.128		6.45737	22.1052	24.4495	20.3542	14.149	12.2242	8.98786	8.74177		59.0433	21.3138	19.6587	10.9243	19.8516	14.8224	18.0255	18.1191	24.541
	20	5.01846	4.945	9.30762	4.79841	5.43078	4.83821	5.38265	5.65235		8.85017	22.5903	27.449	20.4004	16.382	16.8216	10.7561	10.8441		63.4102	21.8235	25.3794	13.4442	24.5205	14.9006	22.6604	19.9988	21.7228
	40	6.04825	6.01263	12.2295	7.21146	6.92358	6.38588	6.3843	7.28415		13.1736	25.3332	33.3956	23.646	19.9131	19.0338	17.0919	17.5975		76.914	26.7104	44.0294	14.705	39.9534	17.5918	29.1367	24.5276	24.5022
	60	9.16474	7.74728	16.9185	8.76964	8.20406	8.60391	8.56045	11.4121		18.2881	34.3042	42.5208	24.8207	24.7408	20.8074	22.1447	23.1793		88.8793	33.9459	64.2622	19.6617	49.6901	20.9663	32.2098	25.6329	26.1723
	80	11.9892	8.64509	21.2873	10.9975	11.5664	11.6624	12.2764	15.9063		27.8847	42.825	49.3795	25.5594	28.6525	39.9602	27.5929	27.1151		94.2393	40.4994	104.374	26.9362	84.7353	32.0541	35.5675	35.7383	33.9196
	100	14.7205	11.122	26.1143	12.6381	13.74	14.3772	15.2329	24.8592		30.9428	45.3231	59.5456	29.7424	37.5624	55.1719	29.4217	36.5785		99.441	50.5168	112.371	31.1826	87.3239	49.7688	35.8903	47.0037	51.2614
