# Supplementary figures and images for: A hydrophobic gate in the inner pore helix is the major determinant of inactivation in mechanosensitive Piezo channels
Source: eLife journal article supplement (doi:10.7554/elife.44003), 2019-01-10

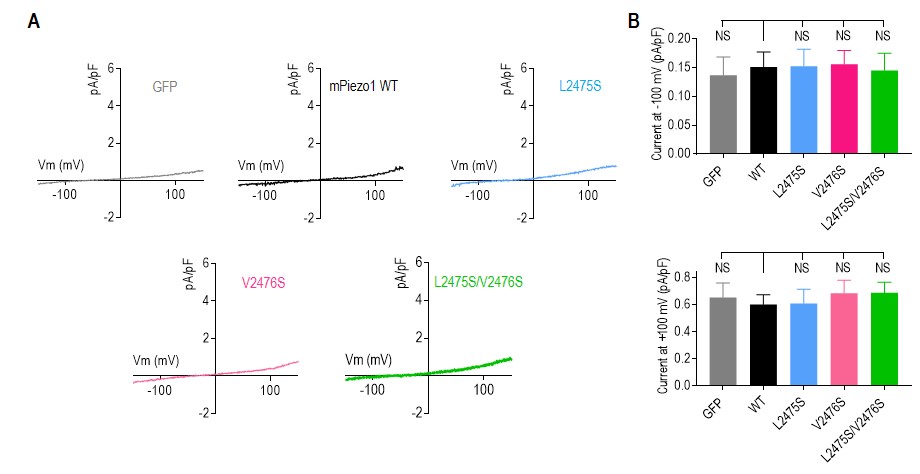

Supplement: supp [file elife-44003-supp-v1.zip › elife_poa_e44003_Figure_2_figure_supplement_1.jpg]

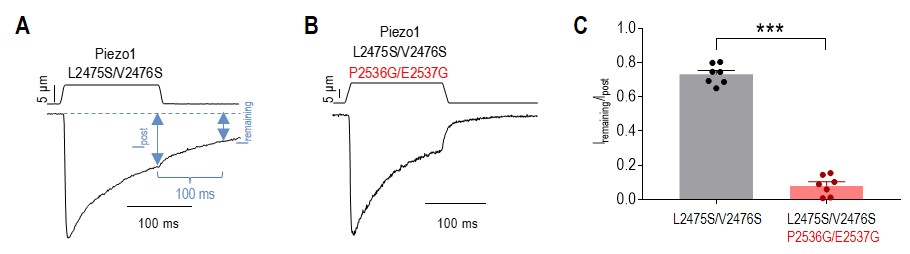

Supplement: supp [file elife-44003-supp-v1.zip › elife_poa_e44003_Figure_1_figure_supplement_1.jpg]
